# Supplementary material for: Enhancing the blue phosphorescence of iridium complexes with a dicyclometalated phosphite ligand via aza-substitution: a density functional theory investigation
Source: Royal Society of Chemistry journal article supplement (doi:10.1039/c4tc01100g), 2014-01-01
Supplement: c4tc01100g1.pdf [file c4tc01100g1.pdf]

## **Enhancing the blue phosphorescence of iridium complexes of dicyclopentylphosphite ligand via aza-substitution: a density functional theory investigation**

*Gahungu Godefroid, <sup>a,b</sup> Liu Yuqi <sup>a</sup>, Si Yanling <sup>a</sup>, Su Juanjuan <sup>a</sup>, Qu Xiaochun <sup>a</sup>, Shang Xiaohong <sup>a</sup> and Wu Zhijian <sup>a\*</sup>*

<sup>a</sup> *Changchun Institute of Applied Chemistry, Chinese Academy of Science, Key Laboratory of Rare Earth Utilization, 130022, Changchun, China. Fax: +86-431-85698041; Tel: +86-431-85262801; E-mail: [zjwu@ciac.jl.cn](mailto:zjwu@ciac.jl.cn)*

<sup>b</sup> *Université du Burundi, Faculté des Sciences, Département de Chimie, BP.2700, Bujumbura, Burundi. Fax: (+257)-22223288. Tel: (+257)-79055192; E-mail: [godefroid.gahungu@ub.edu.bi](mailto:godefroid.gahungu@ub.edu.bi)*

**Electronic Supporting information**

XYZ coordinates of the optimized T<sub>1</sub> structure for **1**

|    |             |             |             |   |             |             |             |
|----|-------------|-------------|-------------|---|-------------|-------------|-------------|
| Ir | -0.45988100 | -1.18505900 | 0.05866600  | C | -6.93710500 | 2.15217400  | -0.35751300 |
| P  | 0.45819300  | 0.92053600  | -0.13882000 | H | -5.78936200 | 3.95946900  | -0.11702900 |
| P  | -2.56976000 | -0.67523100 | 0.09014900  | H | -7.80852200 | 0.20279800  | -0.63373500 |
| O  | -3.44238300 | -2.03524200 | -0.02322200 | H | -7.89261400 | 2.64423700  | -0.20867100 |
| C  | 1.23973300  | -2.16505700 | -2.30358600 | H | -1.29988600 | -1.84623500 | -5.16522000 |
| C  | 1.65372400  | -2.51136100 | -3.64639100 | C | 4.96689800  | -2.48245700 | 0.77524100  |
| H  | 2.67515600  | -2.85203900 | -3.77980700 | F | 5.63002100  | -1.33285300 | 0.55117800  |
| C  | 0.77181000  | -2.40702200 | -4.67108100 | F | 4.92077900  | -2.67283300 | 2.09317100  |
| H  | 1.05377600  | -2.66354800 | -5.68553700 | F | 5.67750400  | -3.46773600 | 0.22826900  |
| C  | -0.55578600 | -1.94355900 | -4.38502600 | O | 1.25991400  | 1.22876200  | -1.52095900 |
| C  | -0.90260300 | -1.59637800 | -3.06113000 | O | -0.61558500 | 2.13916500  | -0.00721200 |
| C  | -1.27760700 | -3.06611500 | 0.29741500  | O | 1.56239500  | 1.22210000  | 1.00388700  |
| C  | -0.56785400 | -4.24488900 | 0.53091000  | C | 2.50687800  | 1.85298800  | -1.56726700 |
| H  | 0.51332300  | -4.20268500 | 0.63668700  | C | 3.63223900  | 1.12404800  | -1.19740300 |
| C  | -1.21615600 | -5.47615600 | 0.64139500  | C | 2.59817400  | 3.16852900  | -2.00370500 |
| H  | -0.63669300 | -6.37610000 | 0.82333700  | C | 4.87953300  | 1.73669300  | -1.24573400 |
| C  | -2.60073600 | -5.55357600 | 0.52769500  | H | 3.52618500  | 0.09669400  | -0.86411300 |
| H  | -3.10681400 | -6.50959100 | 0.61684300  | C | 3.85547600  | 3.76821400  | -2.05084900 |
| C  | -3.34558100 | -4.39703100 | 0.30831600  | H | 1.70185700  | 3.70599900  | -2.29676000 |
| H  | -4.42707000 | -4.41893400 | 0.22670100  | C | 4.99337500  | 3.06126600  | -1.66796900 |
| C  | -2.66773800 | -3.19403300 | 0.20117400  | H | 5.75669800  | 1.17174300  | -0.94760900 |
| C  | -0.70578600 | -0.76552000 | 2.04970600  | H | 3.94046100  | 4.79634500  | -2.38834900 |
| C  | 0.26485500  | -0.93966100 | 3.03992100  | H | 5.96745200  | 3.53825800  | -1.70473300 |
| C  | -1.92380300 | -0.21187300 | 2.46767700  | C | -0.56860300 | 3.31894000  | -0.74257700 |
| C  | 0.02047700  | -0.57207600 | 4.36444100  | C | -1.02669700 | 3.29188100  | -2.05656300 |
| H  | 1.23172600  | -1.35162000 | 2.76545200  | C | -0.11727700 | 4.49186100  | -0.14876300 |
| C  | -2.19537800 | 0.16878400  | 3.77264000  | C | -1.00369100 | 4.46538700  | -2.80434800 |
| C  | -1.20190800 | -0.01569900 | 4.73205600  | H | -1.38716400 | 2.35445100  | -2.46967900 |
| H  | 0.79578200  | -0.71559300 | 5.11048000  | C | -0.10117400 | 5.65839000  | -0.91105300 |
| H  | -3.16333400 | 0.59217700  | 4.01844800  | H | 0.21251400  | 4.48666600  | 0.88497200  |
| H  | -1.38914600 | 0.27221800  | 5.76175500  | C | -0.53366700 | 5.64856700  | -2.23547300 |
| H  | -1.90221800 | -1.22367700 | -2.84519300 | H | -1.35234500 | 4.45322400  | -3.83196400 |
| N  | -0.08061400 | -1.68395700 | -2.04548300 | H | 0.25489600  | 6.57990900  | -0.46159600 |
| N  | 1.54993100  | -1.89214300 | 0.06859200  | H | -0.51381400 | 6.56181900  | -2.82114800 |
| C  | 2.04922600  | -2.24557400 | -1.19977300 | C | 1.63065900  | 2.37633900  | 1.77636900  |
| C  | 3.59315500  | -2.40006400 | 0.17890900  | C | 2.66368300  | 3.27943500  | 1.55681300  |
| N  | 2.53299000  | -1.98388700 | 0.93185300  | C | 0.67452400  | 2.57455000  | 2.76704100  |
| N  | 3.37628100  | -2.58140300 | -1.10633200 | C | 2.72111500  | 4.42687500  | 2.34574800  |
| O  | -2.93913900 | -0.01266400 | 1.51405000  | H | 3.39686500  | 3.08271300  | 0.78063500  |
| C  | -4.50983100 | 0.89967400  | -0.73557500 | C | 0.74576200  | 3.72722200  | 3.54294700  |
| C  | -4.52779500 | 2.26584000  | -0.49367500 | H | -0.10815700 | 1.83598400  | 2.91199900  |
| C  | -5.67018900 | 0.13981900  | -0.79232300 | C | 1.76302400  | 4.65752300  | 3.33144700  |
| C  | -5.75674700 | 2.89153700  | -0.30693000 | H | 3.51984400  | 5.14388000  | 2.18446900  |
| H  | -3.58947900 | 2.81029500  | -0.45393100 | H | 0.00208000  | 3.89359600  | 4.31574100  |
| C  | -6.89091400 | 0.78090200  | -0.59657600 | H | 1.81309000  | 5.55546900  | 3.93891300  |
| H  | -5.60629800 | -0.92646200 | -0.98036500 | O | -3.26613600 | 0.29950700  | -0.97425000 |

XYZ coordinates of the optimized T<sub>1</sub> structure for **2a**

|    |             |             |             |   |             |             |           |
|----|-------------|-------------|-------------|---|-------------|-------------|-----------|
| Ir | -0.15325600 | 0.19402000  | 0.22349200  | C | 4.22494900  | 0.21333800  | -0.200367 |
| P  | 0.42443200  | -1.34277500 | -1.51232000 | C | 4.79759700  | 2.88826200  | -0.770031 |
| P  | 1.81218500  | 0.77905400  | 1.02974200  | H | 2.96407400  | 3.34218800  | 0.271220  |
| O  | 1.57523200  | 2.09685200  | 1.95637600  | C | 5.38575200  | 0.54831600  | -0.891193 |
| C  | -1.91879900 | 1.74763400  | -1.75914900 | H | 4.01163900  | -0.82589800 | 0.036671  |
| C  | -2.36455100 | 2.71257800  | -2.72035800 | C | 5.67019200  | 1.88131600  | -1.178510 |
| H  | -3.40346200 | 2.66882100  | -3.03110100 | H | 5.02708300  | 3.92785100  | -0.981065 |
| C  | -1.48960900 | 3.63465800  | -3.20940100 | H | 6.06839600  | -0.23748400 | -1.199859 |
| H  | -1.80425300 | 4.37450700  | -3.93674300 | H | 6.57760000  | 2.13810600  | -1.716471 |
| C  | -0.13937400 | 3.60908700  | -2.73815000 | C | 2.05366900  | -2.16585600 | -1.435960 |
| C  | 0.23647200  | 2.65680400  | -1.78965200 | C | 3.04960600  | -1.94268500 | -2.390497 |
| C  | -0.75221600 | 1.52752800  | 1.67795400  | C | 2.32249600  | -3.01482400 | -0.352702 |
| C  | -2.06692100 | 1.76725300  | 2.08490100  | C | 4.29785200  | -2.54999600 | -2.263163 |
| H  | -2.87514700 | 1.18247900  | 1.65331500  | H | 2.86345200  | -1.28600000 | -3.234903 |
| C  | -2.37136500 | 2.73365200  | 3.04550900  | C | 3.57357000  | -3.60903900 | -0.221716 |
| H  | -3.40509100 | 2.89618700  | 3.33588300  | H | 1.55813600  | -3.20651700 | 0.396270  |
| C  | -1.35871800 | 3.48351200  | 3.63470800  | C | 4.56506600  | -3.37613200 | -1.175284 |
| H  | -1.59175600 | 4.23375200  | 4.38385500  | H | 5.06224000  | -2.37015700 | -3.013214 |
| C  | -0.03347000 | 3.26241900  | 3.26802300  | H | 3.77218600  | -4.25424300 | 0.628481  |
| H  | 0.78533600  | 3.81552300  | 3.71613800  | H | 5.53997100  | -3.84244400 | -1.071198 |
| C  | 0.23047500  | 2.29808300  | 2.30853600  | C | 0.34080700  | -0.63419200 | -3.200666 |
| C  | 0.09644400  | -1.28762300 | 1.60163300  | H | 0.54120100  | -1.38780000 | -3.967771 |
| C  | -0.83517200 | -2.28609000 | 1.90540300  | H | -0.66609300 | -0.22756500 | -3.339509 |
| C  | 1.32132700  | -1.37390400 | 2.28017900  | H | 1.04755700  | 0.19454100  | -3.296869 |
| C  | -0.53797600 | -3.31892200 | 2.79852400  | C | -0.72746400 | -2.76758400 | -1.609553 |
| H  | -1.80994000 | -2.25627300 | 1.42550200  | H | -1.73564200 | -2.39774900 | -1.816106 |
| C  | 1.64417000  | -2.37858200 | 3.17938500  | H | -0.41457500 | -3.47018800 | -2.386568 |
| C  | 0.69930500  | -3.37026900 | 3.43405300  | H | -0.74927000 | -3.27016500 | -0.638300 |
| H  | -1.28327000 | -4.08262300 | 3.00087200  | H | 0.59504900  | 4.31992000  | -3.096454 |
| H  | 2.61878200  | -2.37690700 | 3.65646900  | C | -6.00428400 | -1.21113100 | 0.872240  |
| H  | 0.92980900  | -4.17015300 | 4.13075300  | H | -6.19063800 | -0.16187000 | 1.123124  |
| H  | 1.26199700  | 2.62639200  | -1.42690100 | H | -6.93926400 | -1.76712400 | 1.002488  |
| N  | -0.58229900 | 1.74475600  | -1.28986500 | H | -5.25954600 | -1.60699600 | 1.568097  |
| N  | -2.17265500 | -0.17354400 | -0.31051300 | C | -5.26841100 | -2.82849200 | -0.902107 |
| C  | -2.72035300 | 0.75198000  | -1.23917300 | H | -6.19947900 | -3.39401600 | -0.787001 |
| C  | -4.22877800 | -0.60073100 | -0.71580300 | H | -4.91874400 | -2.95163400 | -1.932908 |
| N  | -3.12199100 | -1.01600800 | 0.01452700  | H | -4.51644300 | -3.24778000 | -0.228030 |
| N  | -4.03043800 | 0.45618800  | -1.48186400 | C | -6.56562600 | -0.76685300 | -1.541031 |
| O  | 2.31394100  | -0.42974400 | 1.99861900  | H | -6.74053500 | 0.29219800  | -1.333934 |
| C  | -5.52392000 | -1.34566400 | -0.58413600 | H | -6.23367200 | -0.85213400 | -2.579746 |
| C  | 3.34698500  | 1.22277600  | 0.20430700  | H | -7.51009600 | -1.30951400 | -1.428177 |
| C  | 3.63563200  | 2.56278200  | -0.07716900 |   |             |             |           |

---

XYZ coordinates of the optimized T<sub>1</sub> structure for **2c**

|    |             |             |             |   |             |             |             |
|----|-------------|-------------|-------------|---|-------------|-------------|-------------|
| Ir | -0.16035200 | 0.18981500  | 0.21743800  | C | 5.40638900  | 0.54927300  | -0.83976400 |
| P  | 0.42911500  | -1.34012400 | -1.52306000 | H | 4.02680700  | -0.83254100 | 0.06891000  |
| P  | 1.81289800  | 0.76418700  | 1.03790600  | C | 5.68878900  | 1.88416800  | -1.12017000 |
| O  | 1.56500900  | 2.06919700  | 1.98468300  | H | 5.03664900  | 3.92816400  | -0.92491900 |
| C  | -1.91485900 | 1.74585700  | -1.76192900 | H | 6.09603700  | -0.23280500 | -1.14191900 |
| C  | -2.35638600 | 2.71290200  | -2.72208200 | H | 6.60160600  | 2.14557600  | -1.64651400 |
| H  | -3.39541800 | 2.67366400  | -3.03299500 | C | 2.06098000  | -2.15594300 | -1.44460000 |
| C  | -1.47772000 | 3.63234200  | -3.21017300 | C | 3.06357100  | -1.91177600 | -2.38685200 |
| H  | -1.78953600 | 4.37412800  | -3.93659000 | C | 2.32414000  | -3.02426000 | -0.37553300 |
| C  | -0.12804700 | 3.60186900  | -2.73854700 | C | 4.31222000  | -2.51852000 | -2.26079900 |
| C  | 0.24475700  | 2.64916300  | -1.79071300 | H | 2.88238900  | -1.24046000 | -3.22073700 |
| C  | -0.76355600 | 1.52075200  | 1.66261200  | C | 3.57545700  | -3.61794100 | -0.24492300 |
| C  | -2.06775100 | 1.80342900  | 2.06841000  | H | 1.55335500  | -3.23644200 | 0.36106100  |
| H  | -2.91062100 | 1.26161400  | 1.64823400  | C | 4.57322600  | -3.36419300 | -1.18649600 |
| C  | -2.30045700 | 2.78492300  | 3.03336000  | H | 5.08157100  | -2.32360600 | -3.00189600 |
| H  | -3.31852300 | 3.00873700  | 3.34571200  | H | 3.76819500  | -4.28056500 | 0.59301400  |
| C  | -0.08358800 | 3.23027600  | 3.26559700  | H | 5.54809500  | -3.83075900 | -1.08412300 |
| H  | 0.71238000  | 3.79212000  | 3.74921900  | C | 0.34584900  | -0.61917600 | -3.20524600 |
| C  | 0.21934400  | 2.27365300  | 2.30968800  | H | 0.55605900  | -1.36709400 | -3.97519600 |
| C  | 0.07123900  | -1.29046200 | 1.58856700  | H | -0.66384100 | -0.22047200 | -3.34639900 |
| C  | -0.84696900 | -2.29220300 | 1.91483400  | H | 1.04622100  | 0.21577200  | -3.29349300 |
| C  | 1.29300200  | -1.38792800 | 2.26742100  | C | -0.72368000 | -2.76277800 | -1.62528600 |
| C  | -0.49183500 | -3.29763300 | 2.81643800  | H | -1.73154600 | -2.39015400 | -1.82837000 |
| H  | -1.83393600 | -2.29489900 | 1.46026600  | H | -0.41289100 | -3.46111900 | -2.40686200 |
| C  | 1.57228300  | -2.41166100 | 3.15909100  | H | -0.74565500 | -3.27255800 | -0.65786800 |
| H  | -1.20319700 | -4.08573600 | 3.05611300  | H | 0.60851900  | 4.31076200  | -3.09618300 |
| H  | 2.54000100  | -2.45368100 | 3.65439900  | C | -5.99812900 | -1.18955300 | 0.89515900  |
| H  | 1.26988400  | 2.61533600  | -1.42697500 | H | -6.17861000 | -0.13841800 | 1.14238800  |
| N  | -0.57829000 | 1.73879400  | -1.29181500 | H | -6.93510900 | -1.74024500 | 1.03207400  |
| N  | -2.17011400 | -0.17281200 | -0.31328800 | H | -5.25278900 | -1.58665700 | 1.58967500  |
| C  | -2.71927400 | 0.75229200  | -1.24152600 | C | -5.27830500 | -2.81892000 | -0.87552700 |
| C  | -4.22946200 | -0.59446700 | -0.70527700 | H | -6.21166100 | -3.37897400 | -0.75378400 |
| N  | -3.11901200 | -1.01109000 | 0.02213100  | H | -4.93393500 | -2.94880000 | -1.90725900 |
| N  | -4.03049100 | 0.45870200  | -1.47642000 | H | -4.52621700 | -3.23949600 | -0.20239000 |
| O  | 2.29894000  | -0.46080400 | 1.99839700  | C | -6.57070700 | -0.75470300 | -1.51750300 |
| C  | -5.52631300 | -1.33339300 | -0.56342300 | H | -6.74030700 | 0.30601500  | -1.31465500 |
| C  | 3.35391800  | 1.21409400  | 0.23373300  | H | -6.24539700 | -0.84698000 | -2.55771200 |
| C  | 3.63957900  | 2.55637500  | -0.04086200 | H | -7.51660600 | -1.29275700 | -1.39627900 |
| C  | 4.23910400  | 0.20793100  | -0.16339300 | N | 0.69099500  | -3.37637800 | 3.42890900  |
| C  | 4.80809700  | 2.88735400  | -0.71952800 | N | -1.33998600 | 3.49412500  | 3.62639800  |
| H  | 2.96221900  | 3.33325200  | 0.30202900  |   |             |             |             |

XYZ coordinates of the optimized T<sub>1</sub> structure for **2d**

|    |             |             |             |   |             |             |             |
|----|-------------|-------------|-------------|---|-------------|-------------|-------------|
| Ir | -0.15674000 | 0.17368200  | 0.20811300  | C | 5.41484800  | 0.59663600  | -0.78277800 |
| P  | 0.44817700  | -1.33277500 | -1.54243200 | H | 4.03905200  | -0.80930200 | 0.09274000  |
| P  | 1.79696300  | 0.75385400  | 1.05450000  | C | 5.68786000  | 1.93754400  | -1.04274700 |
| O  | 1.53439600  | 2.04392200  | 2.02545300  | H | 5.01421900  | 3.97258300  | -0.82891300 |
| C  | -1.90834600 | 1.77362000  | -1.73632500 | H | 6.11427700  | -0.17522900 | -1.08861800 |
| C  | -2.35101200 | 2.76938400  | -2.66395300 | H | 6.60335400  | 2.21407800  | -1.55663100 |
| H  | -3.39380100 | 2.74768300  | -2.96389300 | C | 2.09459000  | -2.12108300 | -1.47195500 |
| C  | -1.46919300 | 3.69394500  | -3.13756400 | C | 3.09423400  | -1.85316000 | -2.41055700 |
| H  | -1.78229500 | 4.45815600  | -3.83974200 | C | 2.37139600  | -2.99286900 | -0.40909900 |
| C  | -0.11413600 | 3.63705500  | -2.68352200 | C | 4.35258000  | -2.44070900 | -2.28795900 |
| C  | 0.25863500  | 2.65801400  | -1.76476500 | H | 2.90243600  | -1.17917900 | -3.23996900 |
| C  | -0.77864600 | 1.48448000  | 1.66944100  | C | 3.63147200  | -3.56838800 | -0.28263000 |
| C  | -2.09295800 | 1.74557300  | 2.06485600  | H | 1.60365700  | -3.22084000 | 0.32597900  |
| H  | -2.91338800 | 1.18783700  | 1.61695900  | C | 4.62607900  | -3.29165200 | -1.22095100 |
| C  | -1.48675700 | 3.34330100  | 3.57957200  | H | 5.11952400  | -2.22745100 | -3.02656600 |
| H  | -1.80326100 | 4.06977900  | 4.32504300  | H | 3.83399400  | -4.23516600 | 0.54971200  |
| C  | -0.13253500 | 3.17944600  | 3.30001100  | H | 5.60777400  | -3.74454900 | -1.12217400 |
| H  | 0.63646700  | 3.74942700  | 3.80879400  | C | 0.34974800  | -0.59831300 | -3.21785400 |
| C  | 0.18859200  | 2.23786500  | 2.33730500  | H | 0.57236800  | -1.33367300 | -3.99640100 |
| C  | 0.08297000  | -1.32595600 | 1.56816900  | H | -0.66758700 | -0.21702700 | -3.35297000 |
| C  | -0.82778900 | -2.34674100 | 1.86243500  | H | 1.03306300  | 0.25155800  | -3.29797200 |
| C  | 1.29321800  | -1.41245700 | 2.26705700  | C | -0.67773100 | -2.77581400 | -1.65438600 |
| H  | -1.80099800 | -2.34657200 | 1.37573600  | H | -1.69762100 | -2.41855500 | -1.82133600 |
| C  | 1.56762700  | -2.43185400 | 3.16318100  | H | -0.37300600 | -3.44580100 | -2.46275900 |
| C  | 0.57378600  | -3.39203200 | 3.33808500  | H | -0.66592900 | -3.31455300 | -0.70274000 |
| H  | 2.51399000  | -2.47459700 | 3.69043500  | H | 0.62601100  | 4.34667600  | -3.03249500 |
| H  | 0.73510100  | -4.22236900 | 4.02246300  | C | -5.29314000 | -2.80282700 | -0.91269200 |
| H  | 1.28729100  | 2.60466700  | -1.41319300 | H | -4.53874900 | -3.23774000 | -0.25148100 |
| N  | -0.56900300 | 1.74362600  | -1.27806000 | H | -6.23083500 | -3.35462200 | -0.78671800 |
| N  | -2.15879100 | -0.18737600 | -0.34390000 | H | -4.96126800 | -2.92538000 | -1.94950100 |
| C  | -2.71424600 | 0.76832200  | -1.23830100 | C | -5.97688000 | -1.18546700 | 0.88373700  |
| C  | -4.22349500 | -0.58834000 | -0.72711900 | H | -6.13837300 | -0.13498500 | 1.14614100  |
| N  | -3.10665100 | -1.03260800 | -0.02596400 | H | -6.92006100 | -1.72471600 | 1.02387800  |
| N  | -4.02730200 | 0.48746200  | -1.46843100 | H | -5.22952600 | -1.60206400 | 1.56447500  |
| O  | 2.28597300  | -0.47143000 | 2.02038800  | C | -6.57319200 | -0.71848900 | -1.51776900 |
| C  | -5.52403800 | -1.31865100 | -0.58253900 | H | -6.26088400 | -0.80149400 | -2.56289500 |
| C  | 3.34540500  | 1.22857600  | 0.27819100  | H | -7.52275000 | -1.24903900 | -1.39215700 |
| C  | 3.62134200  | 2.57678700  | 0.02363900  | H | -6.73020200 | 0.34118900  | -1.29999500 |
| C  | 4.24380300  | 0.23603500  | -0.12325700 | N | -2.45405700 | 2.64699800  | 2.98583700  |
| C  | 4.79372700  | 2.92722300  | -0.63841000 | N | -0.59884400 | -3.36316900 | 2.70702200  |
| H  | 2.93250900  | 3.34304900  | 0.36749600  |   |             |             |             |

XYZ coordinates of the optimized T<sub>1</sub> structure for **2b**

|    |             |             |             |   |             |             |             |
|----|-------------|-------------|-------------|---|-------------|-------------|-------------|
| Ir | -0.16155400 | 0.19217100  | 0.22917900  | C | 5.37903200  | 0.55437100  | -0.90721300 |
| P  | 0.40737900  | -1.35419900 | -1.50506000 | H | 4.01859300  | -0.83722400 | 0.01550100  |
| P  | 1.81851100  | 0.75079600  | 1.03699900  | C | 5.65577200  | 1.89235000  | -1.17840300 |
| O  | 1.59119500  | 2.04442000  | 1.99510600  | H | 5.00845700  | 3.93398500  | -0.94569700 |
| C  | -1.91810600 | 1.74050100  | -1.76030000 | H | 6.06501400  | -0.22371500 | -1.22765900 |
| C  | -2.35710700 | 2.69895800  | -2.73202800 | H | 6.55958800  | 2.16005300  | -1.71707300 |
| H  | -3.39543900 | 2.65733300  | -3.04495100 | C | 2.03962400  | -2.17124100 | -1.43819700 |
| C  | -1.47642600 | 3.61195900  | -3.22736400 | C | 3.02621100  | -1.94947000 | -2.40289200 |
| H  | -1.78570300 | 4.34640200  | -3.96239400 | C | 2.32356000  | -3.01014800 | -0.35129900 |
| C  | -0.12763200 | 3.58494800  | -2.75288000 | C | 4.27876600  | -2.54881800 | -2.28063300 |
| C  | 0.24302500  | 2.63932100  | -1.79516800 | H | 2.82923500  | -1.30102800 | -3.25114200 |
| C  | -0.73851800 | 1.53398900  | 1.67350000  | C | 3.57982300  | -3.59315800 | -0.22223700 |
| C  | -2.03648800 | 1.83131500  | 2.07693400  | H | 1.56582800  | -3.20663400 | 0.40277800  |
| H  | -2.87627800 | 1.28630700  | 1.65225800  | C | 4.56097400  | -3.36220800 | -1.18676200 |
| C  | -2.26903500 | 2.82472500  | 3.03352100  | H | 5.03587200  | -2.37087000 | -3.03839500 |
| H  | -3.27637900 | 3.06798200  | 3.35422000  | H | 3.79110300  | -4.22241200 | 0.63636400  |
| C  | -1.18246400 | 3.49767000  | 3.56941900  | H | 5.54060300  | -3.81880200 | -1.08502200 |
| H  | -1.31617500 | 4.27964500  | 4.31243300  | C | 0.30371800  | -0.65511000 | -3.19554400 |
| C  | 0.25107900  | 2.28998300  | 2.32545600  | H | 0.49808600  | -1.41362100 | -3.95923400 |
| C  | 0.07801100  | -1.28452200 | 1.60365500  | H | -0.70513500 | -0.25119100 | -3.32751000 |
| C  | -0.85390500 | -2.26040700 | 1.94979300  | H | 1.00866100  | 0.17355600  | -3.30412300 |
| C  | 1.31877600  | -1.41804200 | 2.26017600  | C | -0.74461700 | -2.78030400 | -1.57910500 |
| C  | -0.50865800 | -3.28125900 | 2.84302200  | H | -1.75724700 | -2.41228600 | -1.76659000 |
| H  | -1.84764700 | -2.22794200 | 1.50908800  | H | -0.44561000 | -3.48311000 | -2.36130400 |
| C  | 0.76885300  | -3.29327400 | 3.38134400  | H | -0.74696100 | -3.28464200 | -0.60852100 |
| H  | -1.22348800 | -4.05147800 | 3.11369600  | H | 0.61037000  | 4.28974300  | -3.11548600 |
| H  | 1.08268200  | -4.07186600 | 4.07220000  | C | -6.01795400 | -1.18434700 | 0.89997000  |
| H  | 1.26775000  | 2.60759100  | -1.43017500 | H | -6.20150200 | -0.13376400 | 1.14745100  |
| N  | -0.58128000 | 1.73567600  | -1.28931300 | H | -6.95472700 | -1.73671900 | 1.03181800  |
| N  | -2.18160200 | -0.16302200 | -0.29311700 | H | -5.27529100 | -1.58072800 | 1.59777300  |
| C  | -2.72459300 | 0.75353500  | -1.23263800 | C | -5.28694500 | -2.81028500 | -0.86875200 |
| C  | -4.24008500 | -0.58589700 | -0.69200700 | H | -6.21989000 | -3.37226000 | -0.75217800 |
| N  | -3.13497800 | -0.99676600 | 0.04492600  | H | -4.93744000 | -2.93795000 | -1.89902000 |
| N  | -4.03630400 | 0.45998200  | -1.47119300 | H | -4.53683600 | -3.23034900 | -0.19302000 |
| O  | 2.31638500  | -0.48496000 | 1.97008400  | C | -6.57794300 | -0.74715200 | -1.51479500 |
| C  | -5.53786200 | -1.32544600 | -0.55573000 | H | -6.74954900 | 0.31330500  | -1.31210100 |
| C  | 3.34464500  | 1.20620300  | 0.20704500  | H | -6.24662600 | -0.83788600 | -2.55318700 |
| C  | 3.62603100  | 2.55181400  | -0.05485800 | H | -7.52406200 | -1.28620800 | -1.39929700 |
| C  | 4.22380400  | 0.20498900  | -0.21435300 | N | 1.68747400  | -2.36020000 | 3.09567800  |
| C  | 4.78248000  | 2.89065600  | -0.75037700 | N | 0.08366000  | 3.23200100  | 3.22235700  |
| H  | 2.95695400  | 3.32406100  | 0.31398600  |   |             |             |             |

XYZ coordinates of the optimized T<sub>1</sub> structure for **2e**

|    |             |             |             |   |             |             |             |
|----|-------------|-------------|-------------|---|-------------|-------------|-------------|
| Ir | -0.14263400 | 0.13661100  | 0.15919200  | H | 6.18626200  | 0.07750200  | -0.78916600 |
| P  | 0.58187900  | -1.21910100 | -1.66767700 | H | 6.58924900  | 2.49041600  | -1.22212600 |
| P  | 1.72755200  | 0.78414000  | 1.12086000  | C | 2.21309100  | -2.02806800 | -1.51781100 |
| O  | 1.34999400  | 2.02469500  | 2.11873300  | C | 3.29887300  | -1.67069600 | -2.32195800 |
| C  | -1.97056500 | 1.82499100  | -1.62230800 | C | 2.39425300  | -2.99471100 | -0.51718900 |
| C  | -2.46649200 | 2.88242800  | -2.43644600 | C | 4.54700500  | -2.25995600 | -2.12646000 |
| H  | -3.52205900 | 2.86818600  | -2.68950800 | H | 3.18186000  | -0.92374000 | -3.10105900 |
| C  | -1.62071300 | 3.85939100  | -2.87642000 | C | 3.64463000  | -3.57018500 | -0.31508300 |
| H  | -1.97647400 | 4.67197000  | -3.49930400 | H | 1.55665600  | -3.30140200 | 0.10491900  |
| C  | -0.24209100 | 3.78600300  | -2.49300000 | C | 4.72500200  | -3.20204900 | -1.11753800 |
| C  | 0.18279200  | 2.74735300  | -1.67725600 | H | 5.38095000  | -1.97558800 | -2.76124900 |
| C  | -0.91382800 | 1.35181700  | 1.62724900  | H | 3.77181100  | -4.31070900 | 0.46849100  |
| C  | -2.66065800 | 2.34894300  | 2.75083100  | H | 5.69890100  | -3.65562300 | -0.96112000 |
| H  | -3.73983800 | 2.41225900  | 2.86917500  | C | 0.63479200  | -0.34365600 | -3.27536300 |
| C  | -1.82133600 | 3.13832600  | 3.52634100  | H | 0.92163300  | -1.00974000 | -4.09424800 |
| H  | -2.22969100 | 3.82300800  | 4.26148600  | H | -0.36652200 | 0.05814600  | -3.46014700 |
| C  | -0.01559600 | 2.13829600  | 2.37208100  | H | 1.32369600  | 0.50371500  | -3.22110500 |
| C  | 0.14548200  | -1.45272900 | 1.38788500  | C | -0.57087400 | -2.61150100 | -1.96885300 |
| C  | 1.31267200  | -1.48398300 | 2.18370400  | H | -1.50556500 | -2.20157800 | -2.36231600 |
| C  | -0.39239100 | -3.55054600 | 2.19827800  | H | -0.15155800 | -3.33386500 | -2.67387600 |
| C  | 0.72810300  | -3.62248500 | 3.01591400  | H | -0.80147900 | -3.08353900 | -1.00838900 |
| H  | -1.10467100 | -4.37221700 | 2.16617500  | H | 0.47213100  | 4.53268300  | -2.81895900 |
| H  | 0.90753900  | -4.49282000 | 3.63773400  | C | -5.79815900 | -1.41546000 | 1.00881200  |
| H  | 1.22610500  | 2.68074400  | -1.37263100 | H | -5.91857200 | -0.39738100 | 1.39254000  |
| N  | -0.61406700 | 1.77985600  | -1.22767600 | H | -6.73097400 | -1.96433900 | 1.18065100  |
| N  | -2.11821700 | -0.27857300 | -0.42588700 | H | -4.99166200 | -1.89984800 | 1.56561700  |
| C  | -2.74172000 | 0.76239000  | -1.16812900 | C | -5.29269100 | -2.83772400 | -0.99677100 |
| C  | -4.19615300 | -0.65077600 | -0.68171700 | H | -6.21514700 | -3.40598400 | -0.83365500 |
| N  | -3.02953400 | -1.15440600 | -0.11905400 | H | -5.06572000 | -2.85352500 | -2.06825500 |
| N  | -4.06103200 | 0.49649300  | -1.33138400 | H | -4.47535700 | -3.32760500 | -0.46102100 |
| O  | 2.22026100  | -0.43854700 | 2.08969600  | C | -6.60898600 | -0.70592000 | -1.26832200 |
| C  | -5.48331900 | -1.39553600 | -0.49882400 | H | -6.73818400 | 0.32515900  | -0.92866800 |
| C  | 3.29590100  | 1.34970900  | 0.45096900  | H | -6.39117100 | -0.67777100 | -2.33993800 |
| C  | 3.52028400  | 2.70961600  | 0.21237500  | H | -7.54731600 | -1.24947600 | -1.11435800 |
| C  | 4.25636300  | 0.40108200  | 0.09020600  | C | 1.61907600  | -2.54950600 | 3.00402700  |
| C  | 4.70704400  | 3.11554100  | -0.38997300 | H | 2.52732200  | -2.53929100 | 3.59781500  |
| H  | 2.77837700  | 3.44164800  | 0.51873900  | C | -0.44509700 | 3.03333300  | 3.33060200  |
| C  | 5.43980700  | 0.81583000  | -0.51259900 | H | 0.26974100  | 3.62295800  | 3.89550800  |
| H  | 4.08410900  | -0.65276800 | 0.29364500  | N | -0.67310300 | -2.50600800 | 1.40794000  |
| C  | 5.66368600  | 2.16945300  | -0.75388500 | N | -2.22450000 | 1.48148700  | 1.82938900  |
| H  | 4.88895200  | 4.17053400  | -0.56789900 |   |             |             |             |

XYZ coordinates of the optimized S<sub>0</sub> structure for **1**

|    |           |           |           |   |           |           |           |
|----|-----------|-----------|-----------|---|-----------|-----------|-----------|
| Ir | -0.436593 | -1.185286 | 0.054547  | C | -6.945530 | 2.114200  | -0.331836 |
| P  | 0.430593  | 0.936652  | -0.117635 | H | -5.872840 | 3.928173  | -0.778547 |
| P  | -2.566359 | -0.761692 | 0.080079  | H | -7.738751 | 0.155050  | 0.077019  |
| O  | -3.378978 | -2.151243 | -0.113252 | H | -7.895552 | 2.616530  | -0.182725 |
| C  | 1.222459  | -2.105856 | -2.331901 | H | -1.312544 | -1.837470 | -5.171848 |
| C  | 1.634235  | -2.469510 | -3.612457 | C | 5.011900  | -2.391132 | 0.757661  |
| H  | 2.652747  | -2.813348 | -3.752796 | F | 5.705220  | -1.262325 | 0.497580  |
| C  | 0.721757  | -2.376810 | -4.652050 | F | 4.991597  | -2.546958 | 2.082178  |
| H  | 1.010721  | -2.654099 | -5.660685 | F | 5.702610  | -3.402406 | 0.225371  |
| C  | -0.570286 | -1.924178 | -4.387178 | O | 1.314689  | 1.212672  | -1.454642 |
| C  | -0.902092 | -1.579050 | -3.085054 | O | -0.671745 | 2.135872  | -0.097984 |
| C  | -1.187121 | -3.100866 | 0.265450  | O | 1.449379  | 1.294254  | 1.083123  |
| C  | -0.438924 | -4.252600 | 0.515689  | C | 2.556251  | 1.853620  | -1.440432 |
| H  | 0.635341  | -4.168161 | 0.659851  | C | 3.659428  | 1.159191  | -0.956834 |
| C  | -1.042695 | -5.508975 | 0.595264  | C | 2.659433  | 3.150599  | -1.927018 |
| H  | -0.434799 | -6.386768 | 0.792047  | C | 4.899749  | 1.787964  | -0.950304 |
| C  | -2.418432 | -5.639826 | 0.433055  | H | 3.539838  | 0.152260  | -0.570117 |
| H  | -2.889085 | -6.615734 | 0.497754  | C | 3.909804  | 3.766348  | -1.916562 |
| C  | -3.200987 | -4.511506 | 0.198737  | H | 1.777484  | 3.662052  | -2.299518 |
| H  | -4.277510 | -4.575317 | 0.080925  | C | 5.026588  | 3.093026  | -1.426328 |
| C  | -2.567560 | -3.282172 | 0.124363  | H | 5.760692  | 1.249926  | -0.567552 |
| C  | -0.699897 | -0.799323 | 2.043871  | H | 4.005929  | 4.779883  | -2.292952 |
| C  | 0.291501  | -0.914950 | 3.020886  | H | 5.995375  | 3.582149  | -1.418544 |
| C  | -1.948212 | -0.331772 | 2.474324  | C | -0.593370 | 3.295958  | -0.859991 |
| C  | 0.034961  | -0.573776 | 4.350068  | C | -0.933811 | 3.224153  | -2.207751 |
| H  | 1.279974  | -1.260104 | 2.730049  | C | -0.227756 | 4.495338  | -0.260890 |
| C  | -2.232640 | 0.018908  | 3.785065  | C | -0.879719 | 4.380288  | -2.980936 |
| C  | -1.219499 | -0.105640 | 4.733214  | H | -1.226285 | 2.265999  | -2.627322 |
| H  | 0.825119  | -0.670888 | 5.087926  | C | -0.176785 | 5.643455  | -1.048800 |
| H  | -3.224276 | 0.374240  | 4.043637  | H | 0.010648  | 4.521331  | 0.797176  |
| H  | -1.415958 | 0.160696  | 5.766973  | C | -0.493225 | 5.589717  | -2.404670 |
| H  | -1.893007 | -1.215718 | -2.827645 | H | -1.137379 | 4.334117  | -4.034208 |
| N  | -0.025221 | -1.666896 | -2.079011 | H | 0.114314  | 6.585148  | -0.594380 |
| N  | 1.599996  | -1.829648 | 0.038307  | H | -0.448698 | 6.489425  | -3.009673 |
| C  | 2.097356  | -2.155619 | -1.168905 | C | 1.448572  | 2.468001  | 1.827491  |
| C  | 3.633942  | -2.302330 | 0.188415  | C | 2.463095  | 3.396233  | 1.627652  |
| N  | 2.591440  | -1.915791 | 0.924073  | C | 0.447331  | 2.659026  | 2.773780  |
| N  | 3.391014  | -2.463407 | -1.122883 | C | 2.453982  | 4.563681  | 2.388182  |
| O  | -2.982714 | -0.191285 | 1.530058  | H | 3.234398  | 3.202669  | 0.888673  |
| C  | -4.529135 | 0.833095  | -0.707827 | C | 0.452050  | 3.833022  | 3.521385  |
| C  | -4.588928 | 2.211708  | -0.854341 | H | -0.315215 | 1.897054  | 2.909400  |
| C  | -5.645637 | 0.075223  | -0.378626 | C | 1.449038  | 4.788848  | 3.327266  |
| C  | -5.811099 | 2.850417  | -0.667070 | H | 3.237956  | 5.299880  | 2.242003  |
| H  | -3.686246 | 2.759178  | -1.106284 | H | -0.325428 | 3.995524  | 4.260969  |
| C  | -6.858093 | 0.732070  | -0.185685 | H | 1.448126  | 5.701644  | 3.914205  |

---



H -5.559888 -1.001641 -0.276622 O -3.291693 0.226626 -0.951526

---

XYZ coordinates of the optimized  $S_0$  structure for **2a**

|    |             |             |             |   |             |             |             |
|----|-------------|-------------|-------------|---|-------------|-------------|-------------|
| Ir | -0.14003700 | 0.18233300  | 0.21158500  | C | 4.23127900  | 0.21049700  | -0.23113700 |
| P  | 0.40036300  | -1.42668100 | -1.45552300 | C | 4.80321400  | 2.88362900  | -0.80798000 |
| P  | 1.82456200  | 0.77965000  | 1.01141100  | H | 2.97984900  | 3.34079500  | 0.25026600  |
| O  | 1.58513200  | 2.11327300  | 1.91685700  | C | 5.38733400  | 0.54301400  | -0.93100400 |
| C  | -1.87310700 | 1.75022300  | -1.75965100 | H | 4.01902400  | -0.82750400 | 0.01068800  |
| C  | -2.34708700 | 2.69298200  | -2.67355100 | C | 5.67123400  | 1.87525200  | -1.22254400 |
| H  | -3.38794400 | 2.64315300  | -2.97282600 | H | 5.03350400  | 3.92286100  | -1.02021800 |
| C  | -1.47004700 | 3.64996000  | -3.15699500 | H | 6.06668400  | -0.24418200 | -1.24332100 |
| H  | -1.81089300 | 4.39666100  | -3.86723800 | H | 6.57490300  | 2.13038400  | -1.76750900 |
| C  | -0.14438200 | 3.64101200  | -2.72087500 | C | 2.05416600  | -2.20131700 | -1.40932500 |
| C  | 0.24814800  | 2.67240300  | -1.80886700 | C | 3.01477000  | -1.98334100 | -2.40036700 |
| C  | -0.74286300 | 1.54286800  | 1.64135000  | C | 2.37732400  | -3.00954800 | -0.30956400 |
| C  | -2.05925600 | 1.78181000  | 2.04463100  | C | 4.28116700  | -2.55656800 | -2.29375000 |
| H  | -2.86374600 | 1.18606800  | 1.62074100  | H | 2.78493100  | -1.36076000 | -3.25984800 |
| C  | -2.36426300 | 2.75953700  | 2.99381200  | C | 3.64524600  | -3.57126400 | -0.20067900 |
| H  | -3.39783200 | 2.92181900  | 3.28480000  | H | 1.64152100  | -3.19391900 | 0.46931800  |
| C  | -1.35292900 | 3.51958600  | 3.57284700  | C | 4.60098500  | -3.34457100 | -1.19159000 |
| H  | -1.58791300 | 4.27828400  | 4.31292000  | H | 5.01828900  | -2.38171100 | -3.07174400 |
| C  | -0.02662500 | 3.29708400  | 3.21043100  | H | 3.88555400  | -4.18593200 | 0.66116000  |
| H  | 0.79065300  | 3.85650400  | 3.65357100  | H | 5.58894700  | -3.78637800 | -1.10517200 |
| C  | 0.23921600  | 2.32047100  | 2.26373700  | C | 0.22367400  | -0.80922500 | -3.17243200 |
| C  | 0.09810700  | -1.25600700 | 1.62777700  | H | 0.42902300  | -1.59098800 | -3.90947100 |
| C  | -0.85640300 | -2.21978700 | 1.96582600  | H | -0.80942000 | -0.46594300 | -3.28930800 |
| C  | 1.32212200  | -1.33775000 | 2.30719700  | H | 0.88598300  | 0.04488100  | -3.34009000 |
| C  | -0.57672700 | -3.22515000 | 2.89491100  | C | -0.71369000 | -2.88145500 | -1.43580000 |
| H  | -1.83045200 | -2.18181800 | 1.48303400  | H | -1.74678500 | -2.53842500 | -1.54044300 |
| C  | 1.62655400  | -2.31744600 | 3.23990000  | H | -0.45294800 | -3.57686800 | -2.23830700 |
| C  | 0.66153400  | -3.27959000 | 3.52911800  | H | -0.62723800 | -3.38153800 | -0.46736100 |
| H  | -1.33723300 | -3.96506000 | 3.12659700  | H | 0.57440900  | 4.36920900  | -3.07776700 |
| H  | 2.60090100  | -2.31765700 | 3.71752400  | C | -5.45278900 | -2.55066100 | 0.32913800  |
| H  | 0.87641300  | -4.05895200 | 4.25356500  | H | -5.14004100 | -2.26248100 | 1.33688700  |
| H  | 1.27077800  | 2.61833100  | -1.44600300 | H | -6.43095200 | -3.04030300 | 0.39199800  |
| N  | -0.59281200 | 1.74631600  | -1.33507400 | H | -4.72465100 | -3.27399200 | -0.05094700 |
| N  | -2.16586200 | -0.17298900 | -0.34139500 | C | -6.57019100 | -0.33187900 | -0.03121100 |
| C  | -2.70557900 | 0.69208900  | -1.21257700 | H | -6.62115100 | 0.55805300  | -0.66530600 |
| C  | -4.20582300 | -0.64067500 | -0.67840200 | H | -7.56414800 | -0.79202800 | 0.01157800  |
| N  | -3.12594600 | -1.03484600 | 0.01077500  | H | -6.29252700 | -0.01725300 | 0.98045700  |
| N  | -3.99018300 | 0.43884600  | -1.46068700 | C | -5.97158500 | -1.76298200 | -1.99796100 |
| O  | 2.32752600  | -0.41407300 | 1.99760000  | H | -5.26168100 | -2.48677900 | -2.41332200 |
| C  | -5.54407900 | -1.32990500 | -0.58840800 | H | -6.96170600 | -2.23204300 | -1.96738400 |
| C  | 3.35702400  | 1.22077200  | 0.17880100  | H | -6.01168500 | -0.89918800 | -2.66770200 |
| C  | 3.64614200  | 2.56019900  | -0.10567200 |   |             |             |             |

XYZ coordinates of the optimized  $S_0$  structure for **2c**

|    |             |             |             |   |             |             |             |
|----|-------------|-------------|-------------|---|-------------|-------------|-------------|
| Ir | -0.15017800 | 0.18599000  | 0.20528300  | C | 5.40647700  | 0.49690900  | -0.87377900 |
| P  | 0.38811200  | -1.43556800 | -1.45332700 | H | 4.01529900  | -0.86525400 | 0.04545100  |
| P  | 1.82451800  | 0.76207300  | 1.02282700  | C | 5.70527500  | 1.82764400  | -1.15725000 |
| O  | 1.58187600  | 2.09428000  | 1.93474500  | H | 5.08294600  | 3.88033200  | -0.95680800 |
| C  | -1.84166800 | 1.75167100  | -1.78967700 | H | 6.08296400  | -0.29508400 | -1.17984900 |
| C  | -2.29476800 | 2.68904900  | -2.71974500 | H | 6.61803300  | 2.07644900  | -1.68971600 |
| H  | -3.33303300 | 2.64821300  | -3.02926400 | C | 2.04078800  | -2.21043600 | -1.40435100 |
| C  | -1.40153900 | 3.62974700  | -3.20503800 | C | 3.00430300  | -1.98429800 | -2.39073800 |
| H  | -1.72659900 | 4.37213400  | -3.92706600 | C | 2.35934400  | -3.03028500 | -0.31212200 |
| C  | -0.08012900 | 3.61134100  | -2.75542400 | C | 4.26853400  | -2.56260800 | -2.28673500 |
| C  | 0.29227200  | 2.64991600  | -1.82814000 | H | 2.77820200  | -1.35313500 | -3.24494200 |
| C  | -0.75036100 | 1.55957400  | 1.61401500  | C | 3.62467500  | -3.59837000 | -0.20600100 |
| C  | -2.05521000 | 1.85417000  | 2.01006000  | H | 1.62059600  | -3.22330100 | 0.46172300  |
| H  | -2.89774000 | 1.30338300  | 1.60034400  | C | 4.58289300  | -3.36404500 | -1.19272500 |
| C  | -2.28353900 | 2.85752900  | 2.95377600  | H | 5.00782100  | -2.38242200 | -3.06136100 |
| H  | -3.30061000 | 3.09190100  | 3.26123800  | H | 3.86043000  | -4.22496900 | 0.64833600  |
| C  | -0.06401900 | 3.29736600  | 3.18228300  | H | 5.56863300  | -3.81119000 | -1.10943600 |
| H  | 0.73321400  | 3.86510300  | 3.65703100  | C | 0.20832300  | -0.82064300 | -3.16966900 |
| C  | 0.23608900  | 2.31761500  | 2.24896500  | H | 0.41889200  | -1.60402800 | -3.90337300 |
| C  | 0.05128300  | -1.24176200 | 1.62682800  | H | -0.82671500 | -0.48420100 | -3.28863100 |
| C  | -0.89887800 | -2.19817100 | 1.99068400  | H | 0.86586600  | 0.03662900  | -3.33923700 |
| C  | 1.26796000  | -1.33841200 | 2.31403200  | C | -0.73487400 | -2.88239900 | -1.42108900 |
| C  | -0.57408600 | -3.17072800 | 2.93846900  | H | -1.76655500 | -2.53403200 | -1.52425900 |
| H  | -1.88257800 | -2.18708200 | 1.52737300  | H | -0.48110300 | -3.58320100 | -2.22103800 |
| C  | 1.51496100  | -2.32993700 | 3.25077900  | H | -0.64921700 | -3.38013100 | -0.45147800 |
| H  | -1.30833400 | -3.92600800 | 3.21201400  | H | 0.64995000  | 4.32763400  | -3.11324600 |
| H  | 2.47873600  | -2.37648600 | 3.75331000  | C | -6.07145500 | -1.09560600 | 0.85167200  |
| H  | 1.31045800  | 2.58868000  | -1.45385000 | H | -6.22399500 | -0.02957300 | 1.05120100  |
| N  | -0.56490100 | 1.73905200  | -1.35211000 | H | -7.03146900 | -1.60923700 | 0.97743600  |
| N  | -2.16641900 | -0.14851100 | -0.35021300 | H | -5.36613900 | -1.48504400 | 1.59177700  |
| C  | -2.68977600 | 0.71029400  | -1.23770900 | C | -5.33124800 | -2.81119500 | -0.81874000 |
| C  | -4.20635000 | -0.60380400 | -0.70004700 | H | -6.28184600 | -3.34527200 | -0.70911300 |
| N  | -3.13268700 | -0.99699600 | 0.00564800  | H | -4.95250600 | -2.99070200 | -1.83126400 |
| N  | -3.97574500 | 0.46170100  | -1.49264100 | H | -4.61274800 | -3.22564300 | -0.10557300 |
| O  | 2.29553000  | -0.44239900 | 2.01532600  | C | -6.52370000 | -0.74112000 | -1.59119800 |
| C  | -5.53467200 | -1.30956400 | -0.57228600 | H | -6.67048600 | 0.33145800  | -1.43697500 |
| C  | 3.36989600  | 1.18947400  | 0.21324300  | H | -6.15877300 | -0.88238900 | -2.61309600 |
| C  | 3.67282200  | 2.52763000  | -0.06365600 | H | -7.49012200 | -1.24714300 | -1.49097700 |
| C  | 4.23922000  | 0.17188900  | -0.18947500 | N | 0.60504000  | -3.25541300 | 3.55817800  |
| C  | 4.84106400  | 2.84261800  | -0.75070100 | N | -1.32035100 | 3.57584500  | 3.53207600  |
| H  | 3.00953700  | 3.31368300  | 0.28578700  |   |             |             |             |

XYZ coordinates of the optimized  $S_0$  structure for **2d**

|    |             |             |             |   |             |             |             |
|----|-------------|-------------|-------------|---|-------------|-------------|-------------|
| Ir | -0.14347300 | 0.17172600  | 0.20600900  | C | 5.40405400  | 0.54834100  | -0.87131400 |
| P  | 0.39757200  | -1.44632700 | -1.45040100 | H | 4.02465000  | -0.83470100 | 0.03313900  |
| P  | 1.81857600  | 0.76359000  | 1.02569000  | C | 5.69181800  | 1.88433100  | -1.14114200 |
| O  | 1.56848600  | 2.08766600  | 1.95506100  | H | 5.05194700  | 3.92946100  | -0.92075300 |
| C  | -1.84772900 | 1.74464500  | -1.77267900 | H | 6.08650300  | -0.23487600 | -1.18655600 |
| C  | -2.30899000 | 2.69126800  | -2.68914000 | H | 6.60190700  | 2.14602300  | -1.67200600 |
| H  | -3.35036100 | 2.65365700  | -2.98845300 | C | 2.06509600  | -2.19123100 | -1.41977800 |
| C  | -1.41994500 | 3.63618000  | -3.17362200 | C | 3.01505000  | -1.94969900 | -2.41552500 |
| H  | -1.75111400 | 4.38589200  | -3.88520600 | C | 2.41005900  | -3.00248900 | -0.32902300 |
| C  | -0.09420700 | 3.61175200  | -2.73693300 | C | 4.29063800  | -2.50483600 | -2.32300000 |
| C  | 0.28577200  | 2.64174400  | -1.82172800 | H | 2.76916000  | -1.32524900 | -3.26916500 |
| C  | -0.75159400 | 1.54030500  | 1.62192000  | C | 3.68601300  | -3.54834900 | -0.23496600 |
| C  | -2.06368600 | 1.81773500  | 2.01611900  | H | 1.68302600  | -3.20510600 | 0.45351400  |
| H  | -2.88790000 | 1.24800500  | 1.59081000  | C | 4.63025600  | -3.29925500 | -1.23140800 |
| C  | -1.43712900 | 3.45782000  | 3.47871700  | H | 5.01889100  | -2.31271500 | -3.10524200 |
| H  | -1.74512800 | 4.20892100  | 4.20322200  | H | 3.94131300  | -4.16936900 | 0.61784300  |
| C  | -0.08491400 | 3.27633800  | 3.19964700  | H | 5.62434900  | -3.72935400 | -1.15789200 |
| H  | 0.68997100  | 3.85433000  | 3.69022700  | C | 0.18546300  | -0.83996400 | -3.16619400 |
| C  | 0.22471300  | 2.30347600  | 2.26451300  | H | 0.40300000  | -1.61982300 | -3.90165200 |
| C  | 0.08035300  | -1.26152500 | 1.62879000  | H | -0.85820000 | -0.52626500 | -3.27202100 |
| C  | -0.86141900 | -2.23353300 | 1.98258500  | H | 0.82139700  | 0.03159900  | -3.34538800 |
| C  | 1.29383600  | -1.34236900 | 2.32157700  | C | -0.69797000 | -2.91329700 | -1.40115800 |
| H  | -1.83932400 | -2.22257600 | 1.50377700  | H | -1.73786000 | -2.57989300 | -1.46277000 |
| C  | 1.54774900  | -2.32424700 | 3.26484900  | H | -0.46042600 | -3.59690200 | -2.22077000 |
| C  | 0.52758300  | -3.24386400 | 3.49553500  | H | -0.57297300 | -3.42704700 | -0.44433000 |
| H  | 2.49655800  | -2.36706800 | 3.78763100  | H | 0.63357200  | 4.33005200  | -3.09556800 |
| H  | 0.67123600  | -4.04302400 | 4.21965100  | C | -5.45679800 | -2.52242500 | 0.33347500  |
| H  | 1.30762000  | 2.57633100  | -1.45801900 | H | -5.12713600 | -2.24397800 | 1.33838600  |
| N  | -0.56784500 | 1.72774600  | -1.34531600 | H | -6.44038300 | -2.99924800 | 0.40692300  |
| N  | -2.15557400 | -0.17276900 | -0.35390900 | H | -4.74362400 | -3.25403600 | -0.05886700 |
| C  | -2.69081900 | 0.69665300  | -1.22471700 | C | -6.54855800 | -0.28629000 | 0.00076000  |
| C  | -4.19976300 | -0.62346600 | -0.68103900 | H | -6.59970800 | 0.60641800  | -0.62948400 |
| N  | -3.12005900 | -1.02598200 | 0.00415800  | H | -7.54696400 | -0.73479200 | 0.05839600  |
| N  | -3.97721000 | 0.45299100  | -1.46677300 | H | -6.25025400 | 0.02168200  | 1.00839000  |
| O  | 2.30532700  | -0.43321500 | 2.02673100  | C | -5.99797000 | -1.71507800 | -1.98272400 |
| C  | -5.54514700 | -1.29607700 | -0.57696500 | H | -5.30452500 | -2.44664600 | -2.41213700 |
| C  | 3.36251400  | 1.21283100  | 0.22404500  | H | -6.99369300 | -2.17073200 | -1.93943100 |
| C  | 3.65396200  | 2.55611100  | -0.03985700 | H | -6.03673700 | -0.84738500 | -2.64756000 |
| C  | 4.23978300  | 0.20677100  | -0.19009600 | N | -2.41220500 | 2.75021300  | 2.91174800  |
| C  | 4.81928300  | 2.88780600  | -0.72414100 | N | -0.65162800 | -3.21058800 | 2.87675500  |
| H  | 2.98340200  | 3.33298500  | 0.31610000  |   |             |             |             |

XYZ coordinates of the optimized  $S_0$  structure for **2b**

|    |             |             |             |   |             |             |             |
|----|-------------|-------------|-------------|---|-------------|-------------|-------------|
| Ir | -0.15167800 | 0.18447400  | 0.21327600  | C | 5.38230400  | 0.53692900  | -0.91087100 |
| P  | 0.38243000  | -1.42897600 | -1.45575100 | H | 4.01501500  | -0.85181400 | 0.00535800  |
| P  | 1.82271600  | 0.74243600  | 1.03625300  | C | 5.66764200  | 1.87501300  | -1.17276400 |
| O  | 1.58981400  | 2.04826900  | 1.97835800  | H | 5.03595400  | 3.91911200  | -0.92045700 |
| C  | -1.84355200 | 1.76082000  | -1.77978200 | H | 6.06190700  | -0.24358700 | -1.23888400 |
| C  | -2.29303200 | 2.69758400  | -2.71196500 | H | 6.57183300  | 2.14069500  | -1.71177800 |
| H  | -3.33036300 | 2.65743300  | -3.02478400 | C | 2.03630900  | -2.20247800 | -1.41665200 |
| C  | -1.39696800 | 3.63641300  | -3.19633600 | C | 2.99235200  | -1.98084100 | -2.41142000 |
| H  | -1.71885200 | 4.37808500  | -3.92058500 | C | 2.36766100  | -3.00913000 | -0.31850500 |
| C  | -0.07705600 | 3.61632000  | -2.74320900 | C | 4.26071500  | -2.55031200 | -2.30930100 |
| C  | 0.29166800  | 2.65494800  | -1.81386000 | H | 2.75745200  | -1.35899900 | -3.27002400 |
| C  | -0.73882000 | 1.54431800  | 1.63861300  | C | 3.63834000  | -3.56449200 | -0.21143000 |
| C  | -2.04070100 | 1.83700400  | 2.03481900  | H | 1.63584400  | -3.20187400 | 0.46178500  |
| H  | -2.87546200 | 1.28393200  | 1.61002300  | C | 4.58833300  | -3.33525700 | -1.20708000 |
| C  | -2.27792500 | 2.83400600  | 2.98673300  | H | 4.99414200  | -2.37342100 | -3.09025200 |
| H  | -3.28676200 | 3.07454100  | 3.30477300  | H | 3.88507100  | -4.17109300 | 0.65387100  |
| C  | -1.19501300 | 3.51290800  | 3.52335400  | H | 5.57900800  | -3.77117500 | -1.12303500 |
| H  | -1.33412100 | 4.29845500  | 4.26165900  | C | 0.19094300  | -0.81612800 | -3.17199800 |
| C  | 0.24688700  | 2.30063000  | 2.29486400  | H | 0.39771000  | -1.59908300 | -3.90724100 |
| C  | 0.05880000  | -1.25922800 | 1.61787400  | H | -0.84511900 | -0.48054600 | -3.28470700 |
| C  | -0.90077800 | -2.20078700 | 1.98035100  | H | 0.84666600  | 0.04172400  | -3.34586800 |
| C  | 1.29089100  | -1.39750000 | 2.28707800  | C | -0.73587300 | -2.88059500 | -1.41929800 |
| C  | -0.58357500 | -3.20361500 | 2.90337800  | H | -1.77085800 | -2.53531000 | -1.49814500 |
| H  | -1.88867500 | -2.15274700 | 1.52602700  | H | -0.49539000 | -3.57196000 | -2.23146300 |
| C  | 0.69047200  | -3.23030100 | 3.45051900  | H | -0.62838200 | -3.38998500 | -0.45790100 |
| H  | -1.31751200 | -3.94943500 | 3.19059100  | H | 0.65534400  | 4.33081500  | -3.09994400 |
| H  | 0.98170000  | -3.99803600 | 4.16315400  | C | -6.08779400 | -1.07496900 | 0.85162100  |
| H  | 1.30890300  | 2.59219700  | -1.43724900 | H | -6.23791300 | -0.00850300 | 1.05087900  |
| N  | -0.56816400 | 1.74644700  | -1.33870500 | H | -7.04938200 | -1.58610700 | 0.97594700  |
| N  | -2.17536700 | -0.14197800 | -0.34451900 | H | -5.38450400 | -1.46624900 | 1.59274600  |
| C  | -2.69533800 | 0.72057800  | -1.22968300 | C | -5.34981900 | -2.79222100 | -0.81769300 |
| C  | -4.21771800 | -0.58857100 | -0.69631100 | H | -6.30216500 | -3.32362200 | -0.70966300 |
| N  | -3.14610900 | -0.98754100 | 0.00895800  | H | -4.96980500 | -2.97252900 | -1.82953300 |
| N  | -3.98274200 | 0.47793900  | -1.48588600 | H | -4.63327800 | -3.20866900 | -0.10373400 |
| O  | 2.30711800  | -0.48589900 | 1.98570700  | C | -6.53416100 | -0.71829100 | -1.59182800 |
| C  | -5.54873900 | -1.28997900 | -0.57130000 | H | -6.67773800 | 0.35473600  | -1.43770500 |
| C  | 3.35470900  | 1.19349000  | 0.21361100  | H | -6.16737400 | -0.86026500 | -2.61292000 |
| C  | 3.64555900  | 2.53923800  | -0.03786800 | H | -7.50241000 | -1.22137400 | -1.49386600 |
| C  | 4.22637100  | 0.19026500  | -0.21795600 | N | 1.63247000  | -2.32608300 | 3.14890100  |
| C  | 4.80254800  | 2.87572900  | -0.73402500 | N | 0.07395500  | 3.24797100  | 3.18543500  |
| H  | 2.98394800  | 3.31300200  | 0.34124100  |   |             |             |             |

XYZ coordinates of the optimized  $S_0$  structure for **2e**

|    |             |             |             |   |             |             |             |
|----|-------------|-------------|-------------|---|-------------|-------------|-------------|
| Ir | -0.13188200 | 0.19941400  | 0.21483200  | C | 5.38959600  | 0.44174000  | -0.92703600 |
| P  | 0.35774900  | -1.41109200 | -1.47205100 | H | 3.98335700  | -0.85185500 | 0.06803700  |
| P  | 1.83306200  | 0.83722100  | 0.98102500  | C | 5.70897000  | 1.75309600  | -1.27265500 |
| O  | 1.59472200  | 2.21336800  | 1.83451000  | H | 5.12580200  | 3.82363100  | -1.15822600 |
| C  | -1.92356500 | 1.73652300  | -1.70959000 | H | 6.04522400  | -0.37648900 | -1.20849000 |
| C  | -2.43230600 | 2.67603300  | -2.61200900 | H | 6.61881600  | 1.96137000  | -1.82714500 |
| H  | -3.47957400 | 2.61091900  | -2.88456700 | C | 1.97083200  | -2.26291400 | -1.37227800 |
| C  | -1.58225500 | 3.64445500  | -3.11601000 | C | 2.97882100  | -2.06273900 | -2.31952100 |
| H  | -1.95188100 | 4.38580000  | -3.81753000 | C | 2.22271000  | -3.09886600 | -0.27455000 |
| C  | -0.24365400 | 3.65670000  | -2.71517900 | C | 4.22096100  | -2.67783500 | -2.17122600 |
| C  | 0.18467900  | 2.69436600  | -1.81463300 | H | 2.80585000  | -1.41911100 | -3.17673300 |
| C  | -0.73147300 | 1.61007000  | 1.59587000  | C | 3.46795200  | -3.70056300 | -0.12215200 |
| C  | -2.33087900 | 2.80457700  | 2.74463600  | H | 1.44527100  | -3.28212600 | 0.46376700  |
| H  | -3.39231400 | 2.93160400  | 2.94405400  | C | 4.47138400  | -3.48904000 | -1.06859100 |
| C  | -1.39655400 | 3.62789500  | 3.36095900  | H | 4.99291400  | -2.51676400 | -2.91783500 |
| H  | -1.71222300 | 4.40309800  | 4.05069800  | H | 3.65262600  | -4.33827300 | 0.73690800  |
| C  | -0.04820000 | 3.43343600  | 3.06756400  | H | 5.44097600  | -3.96243500 | -0.94842500 |
| H  | 0.73735000  | 4.03877700  | 3.50855100  | C | 0.28926700  | -0.75177300 | -3.18085500 |
| C  | 0.25932000  | 2.42264400  | 2.17893700  | H | 0.47346700  | -1.53284700 | -3.92416000 |
| C  | 0.15188300  | -1.24288400 | 1.60389300  | H | -0.71466500 | -0.34195700 | -3.32970000 |
| C  | 1.35932300  | -1.24991300 | 2.33753000  | H | 1.00969400  | 0.06112400  | -3.30666700 |
| C  | -0.46598700 | -3.18080800 | 2.69853400  | C | -0.86132800 | -2.77683000 | -1.49782700 |
| C  | 1.64487800  | -2.22387800 | 3.27210000  | H | -1.80863400 | -2.38393600 | -1.87813400 |
| C  | 0.69204400  | -3.22451200 | 3.46415300  | H | -0.51161600 | -3.60350700 | -2.12169800 |
| H  | -1.22909300 | -3.94819400 | 2.80559900  | H | -1.04371800 | -3.09952400 | -0.46818500 |
| H  | 2.58316100  | -2.19987700 | 3.81688700  | H | 0.45450100  | 4.39519400  | -3.09112700 |
| H  | 0.85163500  | -4.01842000 | 4.18547600  | C | -5.34855000 | -2.64576000 | 0.43797300  |
| H  | 1.21745900  | 2.65329400  | -1.47808700 | H | -5.01331800 | -2.35142400 | 1.43613700  |
| N  | -0.63101100 | 1.75555300  | -1.32088300 | H | -6.31377600 | -3.15820800 | 0.52329700  |
| N  | -2.14822700 | -0.18693200 | -0.27996800 | H | -4.61178100 | -3.34926900 | 0.03810100  |
| C  | -2.71956200 | 0.66551500  | -1.14673800 | C | -6.53053900 | -0.45617300 | 0.10817100  |
| C  | -4.17174900 | -0.70217400 | -0.58634700 | H | -6.61653800 | 0.43369500  | -0.52252800 |
| N  | -3.07341600 | -1.06814200 | 0.08981200  | H | -7.51189300 | -0.94134600 | 0.17019400  |
| N  | -3.99940400 | 0.37851300  | -1.37809100 | H | -6.23759900 | -0.13625400 | 1.11349400  |
| O  | 2.32092100  | -0.28659800 | 2.06387700  | C | -5.93565400 | -1.86506000 | -1.87490600 |
| C  | -5.49029500 | -1.42523500 | -0.47307500 | H | -5.21619500 | -2.57052300 | -2.30584800 |
| C  | 3.38137900  | 1.22143600  | 0.15454000  | H | -6.91355300 | -2.35836100 | -1.82757100 |
| C  | 3.70316100  | 2.53894100  | -0.18744900 | H | -6.00872300 | -1.00084000 | -2.54152600 |
| C  | 4.22631100  | 0.17028000  | -0.21357800 | N | -0.72382900 | -2.22592800 | 1.79641600  |
| C  | 4.86854800  | 2.80101300  | -0.90126100 | N | -2.01216200 | 1.82688600  | 1.88924100  |
| H  | 3.05612500  | 3.35188700  | 0.12914300  |   |             |             |             |

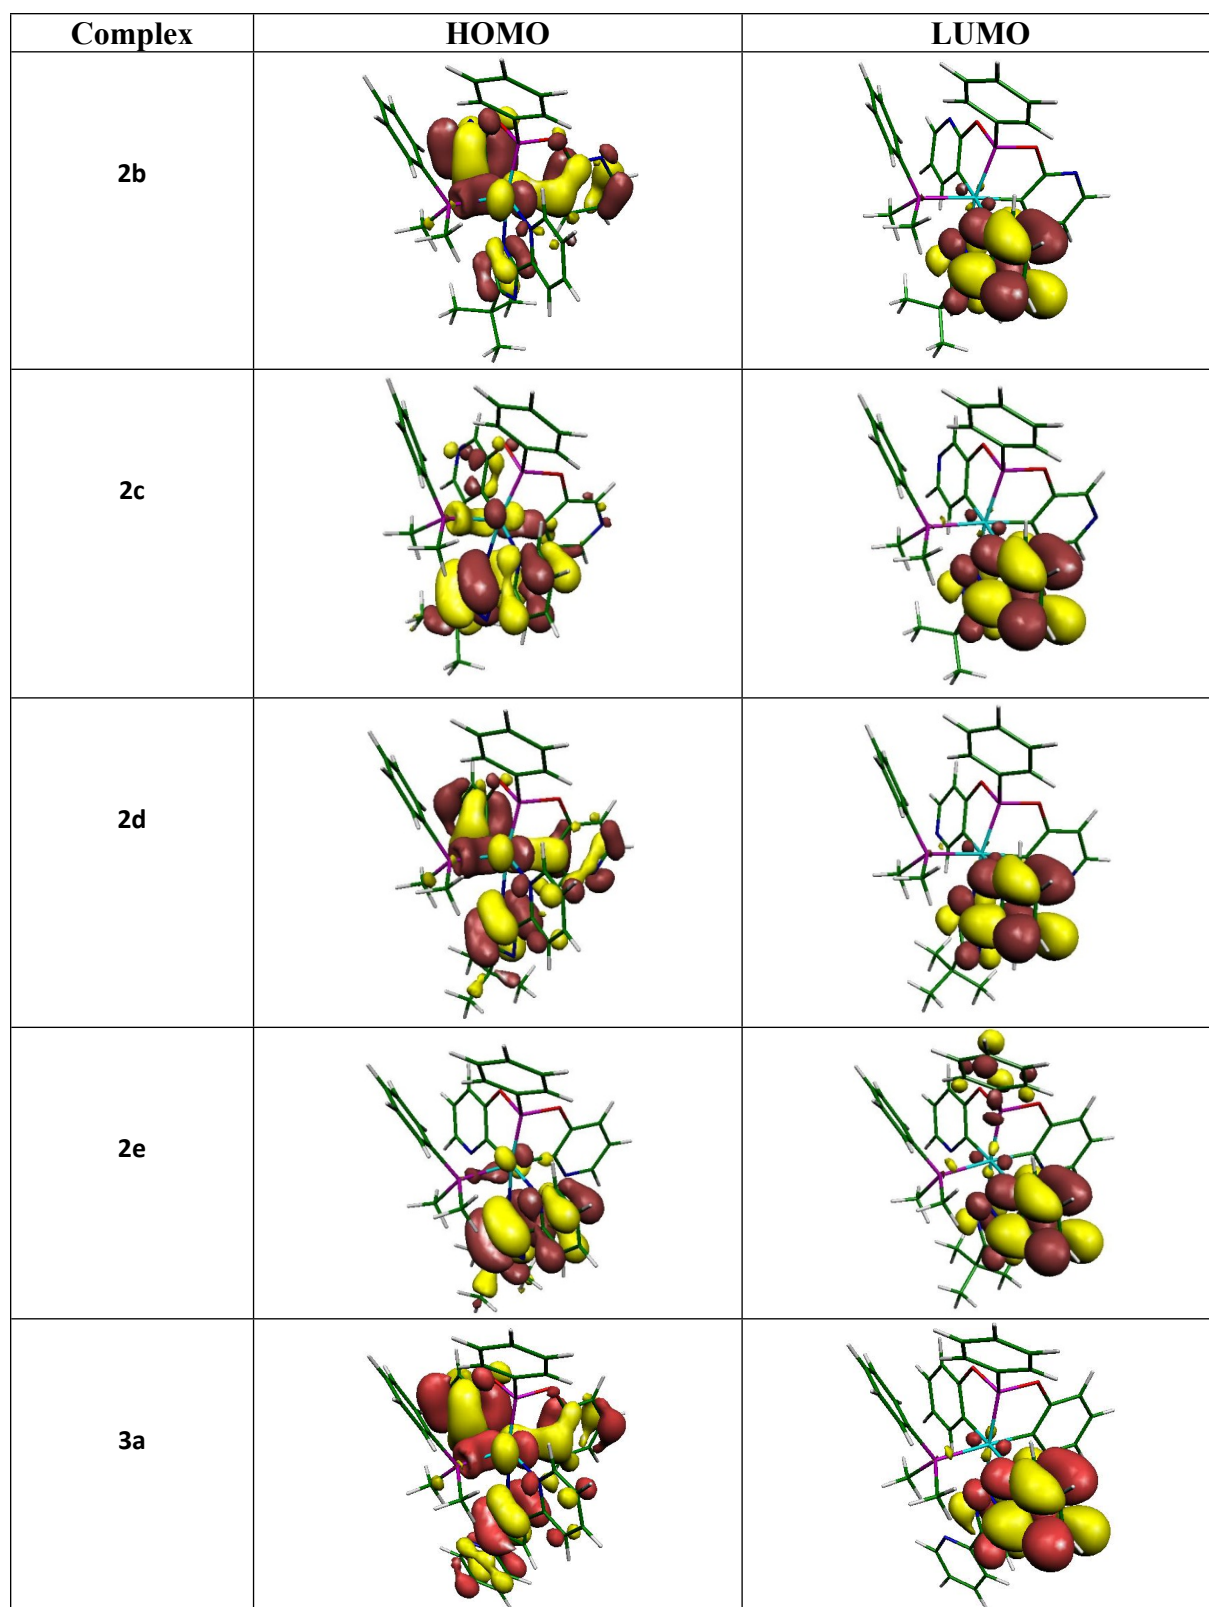

**Figure S1.** Frontier orbitals involved in the lower-lying electronic transitions for complexes **2b-e** and **3a**.

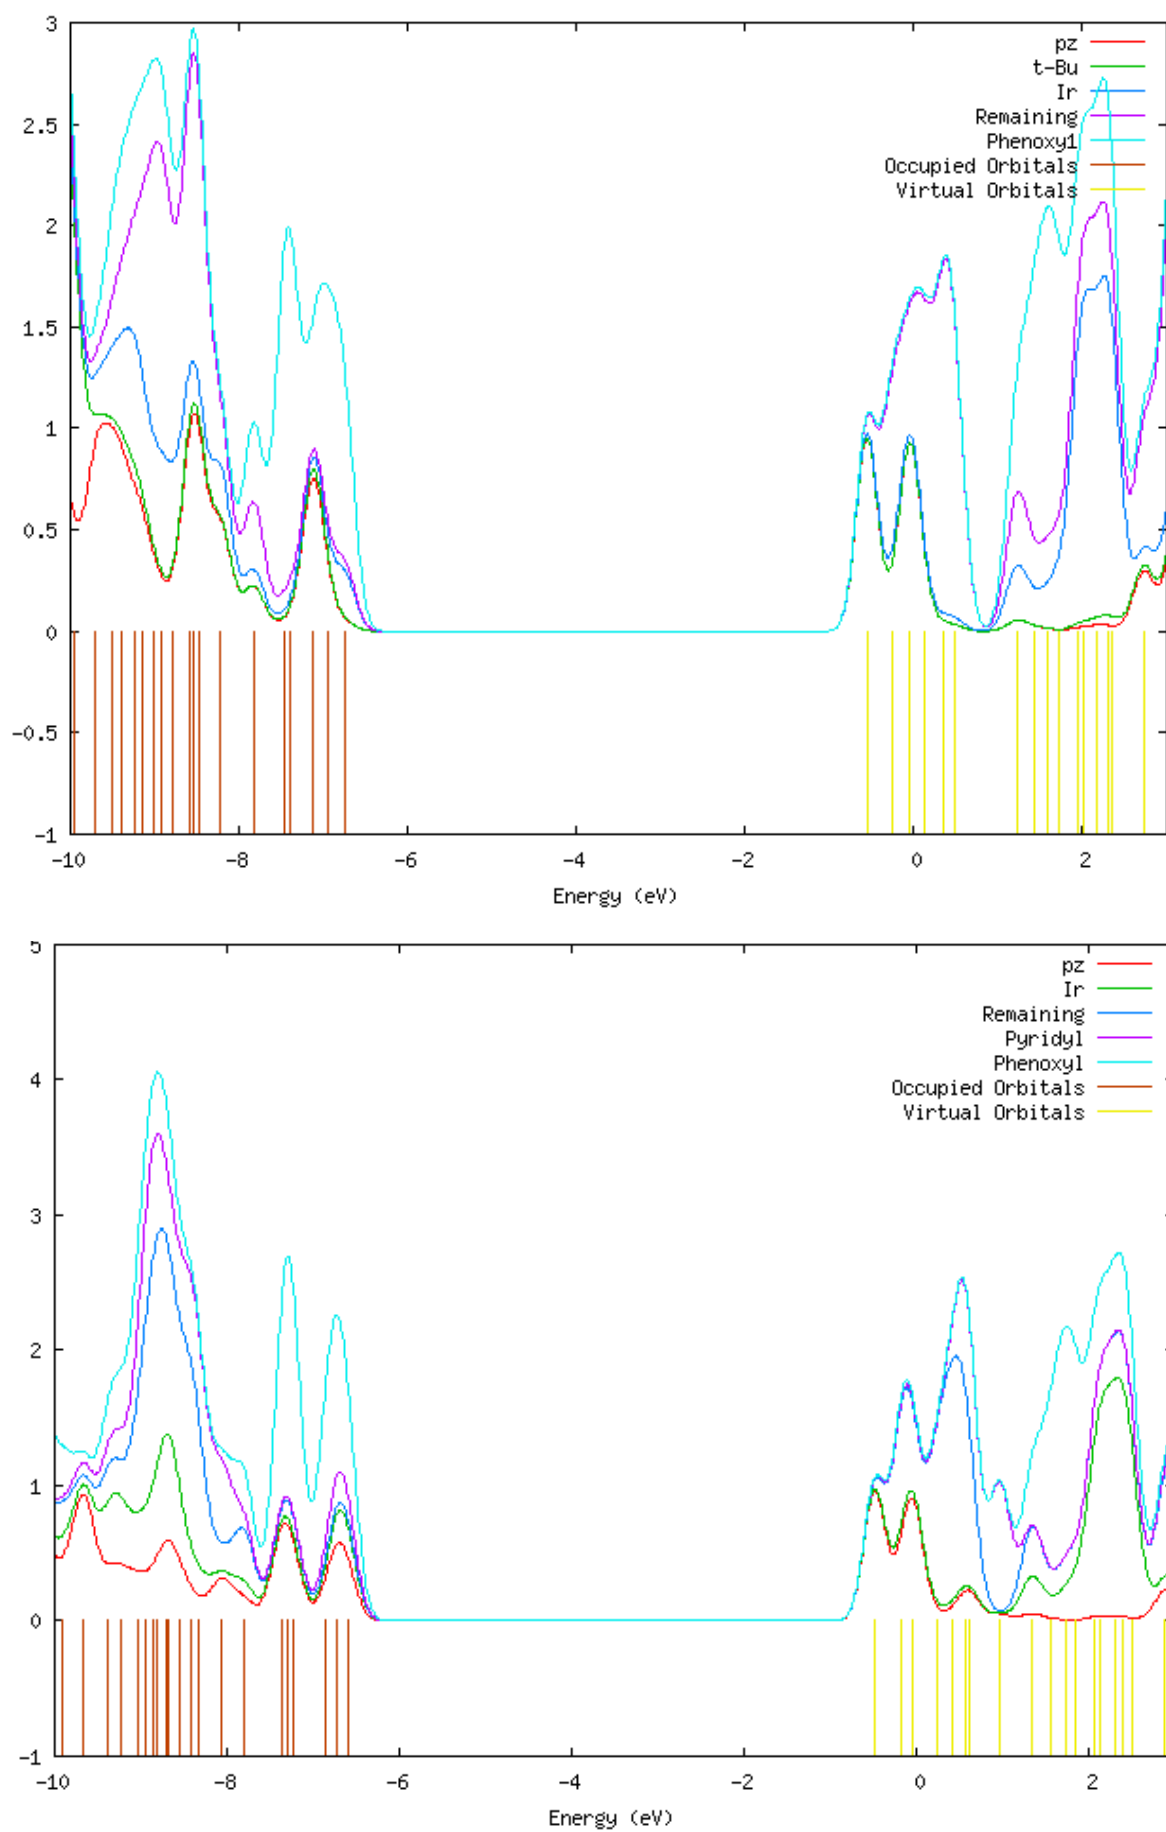

**Figure S2:** Partial density of state (PDOS) for complexes **2a** (top) and **3a** (bottom).

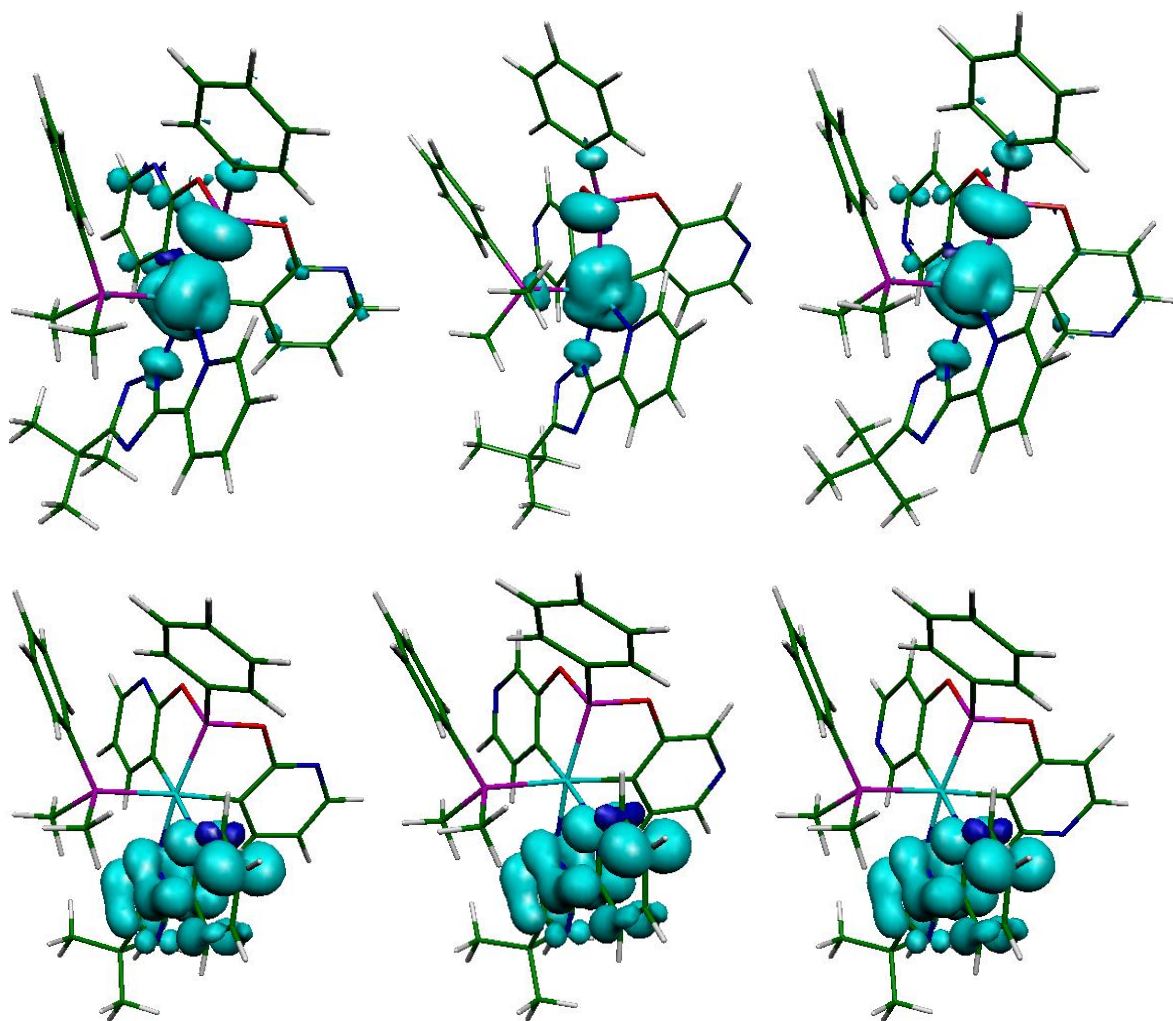

**Figure S3:** Spin density distribution (isocontour value of  $5 \cdot 10^{-3}$  au) for **2b-c** in both the optimized <sup>3</sup>MLCT and <sup>3</sup>MC structures.



**Table S1:** M062X ionization potentials (IPs), electron affinities (EAs), extraction potentials for hole (HEP) and electron (EEP), and inner reorganization energies for electron/hole ( $\lambda_e/\lambda_h$ ) for the studied molecules.\*

| <b>Cplx</b> | <b>IP(v)</b> | <b>EA(v)</b> | <b>IP(a)</b> | <b>EA(a)</b> | <b>HEP</b> | <b>EEP</b> | $\lambda_h$ | $\lambda_e$ |
|-------------|--------------|--------------|--------------|--------------|------------|------------|-------------|-------------|
| <b>2a</b>   | 7.21         | 0.41         | 6.93         | 0.66         | 6.65       | 0.90       | 0.56        | 0.49        |
| <b>4N1</b>  | 7.82         | 0.64         | 7.54         | 0.89         | 7.17       | 1.12       | 0.65        | 0.48        |
| <b>4N2</b>  | 7.54         | 0.57         | 7.26         | 0.82         | 6.96       | 1.05       | 0.59        | 0.48        |
| <b>4N3</b>  | 7.49         | 0.56         | 7.22         | 0.80         | 6.92       | 1.04       | 0.57        | 0.48        |
| <b>4N4</b>  | 7.38         | 0.26         | 6.84         | 0.50         | 6.43       | 0.76       | 0.95        | 0.50        |
| <b>5c</b>   | 7.07         | 0.36         | 6.81         | 0.59         | 6.51       | 0.83       | 0.56        | 0.47        |
| <b>4c</b>   | 7.19         | 0.48         | 6.92         | 0.73         | 6.63       | 0.97       | 0.55        | 0.48        |

\*Cplx = Complex. (v) and (a) indicate vertical and adiabatic values, respectively. Values are in eV.
